# Supplementary material for: Quality evaluation of Semen Platycladi samples of different origins by internal extractive electrospray ionization mass spectrometry
Source: Royal Society of Chemistry journal article supplement (doi:10.1039/d4ay01881h), 2025-01-01
Supplement: d4ay01881h1.pdf [file d4ay01881h1.pdf]

1 **Quality evaluation of Semen Platycladi samples from**  
2 **different origins by Internal Extractive Electrospray**  
3 **Ionization Mass Spectrometry**

4

5 **Ning Wang<sup>a</sup>, Siyu Xie<sup>a</sup>, Peng Liu<sup>a</sup>, Leting Wang<sup>a</sup>, Chao Zhong<sup>b</sup>, Jun Yu<sup>c</sup>, Manman Qin<sup>b\*</sup>, Huanwen**

6 **Chen<sup>a\*</sup>**

7

8 <sup>a</sup> Key Laboratory of Traditional Chinese Medicine Diagnosis, Treatment and Rehabilitation of Malignant

9 Tumors in Jiangxi Province, Jiangxi University of Chinese Medicine, Nanchang 330004, China

10 <sup>b</sup> Center for Translational Medicine, Jiangxi University of Chinese Medicine, Nanchang 330004, China

11 <sup>c</sup> Department of Cardiovascular Sciences and Centre for Metabolic Disease Research, Lewis Katz School of

12 Medicine, Temple University, Philadelphia, PA, USA.

13 \* Correspondence:

14 Huanwen Chen

15 [chw8868@gmail.com](mailto:chw8868@gmail.com)

16 Key Laboratory of Traditional Chinese Medicine Diagnosis, Treatment and Rehabilitation of Malignant

17 Tumors in Jiangxi Province, Jiangxi University of Chinese Medicine, Nanchang 330004, China

18 Manman Qin

19 [20142016@jxutcm.edu.cn](mailto:20142016@jxutcm.edu.cn)

20 Center for Translational Medicine, Jiangxi University of Chinese Medicine, Nanchang 330004, China

## 21 **Preparation of standard solutions**

### 22 **1. Arachidonic acid standard solution**

23 First, 2.2  $\mu\text{L}$  of arachidonic acid standard (density: 0.922 g/mL) was taken and 997.8  $\mu\text{L}$  of  
24 methanol was added to prepare 2 mg/mL standard solution. 0.5 mL of 2 mg/mL arachidonic acid  
25 standard solution was taken and 0.5 mL of methanol was added to prepare 1 mg/mL standard solution.  
26 0.2 mL of 1 mg/mL arachidonic acid standard solution was taken and 0.8 mL of methanol was added to  
27 prepare 0.2 mg/mL standard solution. 0.5 mL of 0.2 mg/mL arachidonic acid standard solution was  
28 taken and 0.5 mL of methanol was added to prepare 0.1 mg/mL standard solution. 0.1 mL of 0.1  
29 mg/mL arachidonic acid standard solution was taken and 0.9 mL of methanol was added to prepare  
30 0.01 mg/mL standard solution. 0.1 mL of 0.01 mg/mL arachidonic acid standard solution was taken  
31 and 0.9 mL of methanol was added to prepare 0.001 mg/mL standard solution. 0.1 mL of 0.001 mg/mL  
32 arachidonic acid standard solution was taken and 0.9 mL of methanol was added to prepare 0.0001  
33 mg/mL standard solution. The prepared standard solution was stored in the refrigerator at 4 °C for  
34 reserve (Table S1).

### 35 **2. Linoleic acid standard solution**

36 First, 11.1  $\mu\text{L}$  of linoleic acid standard (density: 0.902 g/mL) was taken and 988.9  $\mu\text{L}$  of methanol  
37 was added to prepare 10 mg/mL standard solution. 0.8 mL of 10 mg/mL linoleic acid standard solution  
38 was taken and 0.2 mL of methanol was added to prepare 8 mg/mL standard solution. 0.625 mL of 10  
39 mg/mL linoleic acid standard solution was taken and 0.375 mL of methanol was added to prepare 5  
40 mg/mL standard solution. 0.4 mL of 5 mg/mL linoleic acid standard solution was taken and 0.6 mL of  
41 methanol was added to prepare 2 mg/mL standard solution. 0.5 mL of 2 mg/mL linoleic acid standard  
42 solution was taken and 0.5 mL of methanol was added to prepare 1 mg/mL standard solution. 0.1 mL  
43 of 1 mg/mL linoleic acid standard solution was taken and 0.9 mL of methanol was added to prepare 0.1  
44 mg/mL standard solution. 0.1 mL of 0.1 mg/mL linoleic acid standard solution was taken and 0.9 mL  
45 of methanol was added to prepare 0.01 mg/mL standard solution. 0.1 mL of 0.01 mg/mL linoleic acid  
46 standard solution was taken and 0.9 mL of methanol was added to prepare 0.001 mg/mL standard  
47 solution. The prepared standard solution was stored in the refrigerator at 4 °C for reserve (Table S1).

### 48 **3. Linolenic acid standard solution**

49 First, 11.0  $\mu\text{L}$  of linolenic acid standard (density: 0.914 g/mL) was taken and 989  $\mu\text{L}$  of methanol  
50 was added to prepare 10 mg/mL standard solution. 0.8 mL of 10 mg/mL linolenic acid standard  
51 solution was taken and 0.2 mL of methanol was added to prepare 8 mg/mL standard solution. 0.625 mL  
52 of 10 mg/mL linolenic acid standard solution was taken and 0.375 mL of methanol was added to  
53 prepare 5 mg/mL standard solution. 0.4 mL of 5 mg/mL linolenic acid standard solution was taken and  
54 0.6 mL of methanol was added to prepare 2 mg/mL standard solution. 0.5 mL of 2 mg/mL linolenic  
55 acid standard solution was taken and 0.5 mL of methanol was added to prepare 1 mg/mL standard  
56 solution. 0.1 mL of 1 mg/mL linolenic acid standard solution was taken and 0.9 mL of methanol was  
57 added to prepare 0.1 mg/mL standard solution. 0.1 mL of 0.1 mg/mL linolenic acid standard solution  
58 was taken and 0.9 mL of methanol was added to prepare 0.01 mg/mL standard solution. 0.1 mL of 0.01  
59 mg/mL linolenic acid standard solution was taken and 0.9 mL of methanol was added to prepare 0.001  
60 mg/mL standard solution. The prepared standard solution was stored in the refrigerator at 4 °C for  
61 reserve (Table S1).

### 62 **4. Palmitic acid standard solution**

63 First, 2 mg of palmitic acid standard was taken and 1 mL of methanol was added to prepare 2  
64 mg/mL standard solution. 0.5 mL of 2 mg/mL palmitic acid standard solution was taken and 0.5 mL of

65 methanol was added to prepare 1 mg/mL standard solution. 0.2 mL of 1 mg/mL palmitic acid standard  
 66 solution was taken and 0.8 mL of methanol was added to prepare 0.2 mg/mL standard solution. 0.5 mL  
 67 of 0.2 mg/mL palmitic acid standard solution was taken and 0.5 mL of methanol was added to prepare  
 68 0.1 mg/mL standard solution. 0.1 mL of 0.1 mg/mL palmitic acid standard solution was taken and 0.9  
 69 mL of methanol was added to prepare 0.01 mg/mL standard solution. 0.1 mL of 0.01 mg/mL palmitic  
 70 acid standard solution was taken and 0.9 mL of methanol was added to prepare 0.001 mg/mL standard  
 71 solution. 0.1 mL of 0.001 mg/mL palmitic acid standard solution was taken and 0.9 mL of methanol  
 72 was added to prepare 0.0001 mg/mL standard solution. The prepared standard solution was stored in  
 73 the refrigerator at 4 °C for reserve (Table S1).

74 **5. Stearic acid standard solution**

75 First, 2 mg of stearic acid standard was taken and 1 mL of methanol was added to prepare 2  
 76 mg/mL standard solution. 0.5 mL of 2 mg/mL stearic acid standard solution was taken and 0.5 mL of  
 77 methanol was added to prepare 1 mg/mL standard solution. 0.2 mL of 1 mg/mL stearic acid standard  
 78 solution was taken and 0.8 mL of methanol was added to prepare 0.2 mg/mL standard solution. 0.5 mL  
 79 of 0.2 mg/mL stearic acid standard solution was taken and 0.5 mL of methanol was added to prepare  
 80 0.1 mg/mL standard solution. 0.1 mL of 0.1 mg/mL stearic acid standard solution was taken and 0.9  
 81 mL of methanol was added to prepare 0.01 mg/mL standard solution. 0.1 mL of 0.01 mg/mL stearic  
 82 acid standard solution was taken and 0.9 mL of methanol was added to prepare 0.001 mg/mL standard  
 83 solution. 0.1 mL of 0.001 mg/mL stearic acid standard solution was taken and 0.9 mL of methanol was  
 84 added to prepare 0.0001 mg/mL standard solution. The prepared standard solution was stored in the  
 85 refrigerator at 4 °C for reserve (Table S1).

86  
87

88 Table S1. Concentrations of five fatty acid standard solutions.

89  
90

| Fatty Acid       | value/(mg/mL)                       |
|------------------|-------------------------------------|
| arachidonic acid | 0.0001, 0.001, 0.01, 0.1, 0.2, 1 ,2 |
| linoleic acid    | 0.001, 0.01, 0.1, 1, 2, 5, 8, 10    |
| linolenic acid   | 0.001, 0.01, 0.1, 1 ,2, 5, 8, 10    |
| palmitic acid    | 0.0001, 0.001, 0.01, 0.1, 0.2, 1, 2 |
| stearic acid     | 0.0001, 0.001, 0.01, 0.1, 0.2, 1, 2 |

99  
100

101 **Preparation of standard solutions for GC-MS experiments**

102 First, 4.2  $\mu\text{L}$  of triarachidonin standard (density: 0.948 g/mL), 34.6  $\mu\text{L}$  of trilinolein standard  
103 (density: 0.925 g/mL), 8.5  $\mu\text{L}$  of trilinolenin standard (density: 0.946 g/mL), 4 mg of tripalmitin  
104 standard and 8 mg of tristealin standard was taken and 152.7  $\mu\text{L}$  of n-hexane was added to prepare  
105 mixed standard solution. This mixed standard solution is used as a high concentration solution. Take  
106 0.05 mL of high concentration solution, add 0.15 mL of n-hexane to dilute as medium concentration  
107 solution. Take 0.05 mL of medium concentration solution, add 0.15 mL of n-hexane to dilute as low  
108 concentration solution. Specific concentrations are shown in Table S2. The prepared standard solution  
109 was stored in the refrigerator at 4 °C for reserve.

110

111

112

113

114 Table S2. Concentrations of three fatty acid triglycerides standard solutions

115

116

117

118

119

120

121

122

123

124

125

| <b>Fatty acid triglycerides</b> | <b>value/(mg/mL)</b> |
|---------------------------------|----------------------|
| triarachidonin                  | 1.25, 5, 20          |
| trilinolein                     | 10, 40, 160          |
| trilinolenin                    | 2.5, 10, 40          |
| tripalmitin                     | 1.25, 5, 20          |
| tristealin                      | 2.5, 10, 40          |

126 Table S3. Analytical results of spiked samples by GC-MS (n = 6)

127

| <b>Sample</b>    | <b>Sample background value (mg/mL)</b> | <b>Added value (mg/mL)</b> | <b>Measured value (mg/mL)</b> | <b>Recovery rate/%</b> | <b>RSD/%</b> |
|------------------|----------------------------------------|----------------------------|-------------------------------|------------------------|--------------|
| arachidonic acid | 1.14                                   | 0.125                      | 1.30                          | 124.3                  | 27.49        |
|                  |                                        | 0.5                        | 1.55                          | 81.9                   | 10.31        |
|                  |                                        | 2                          | 2.79                          | 82.7                   | 31.67        |
| linoleic acid    | 0.08                                   | 1                          | 0.99                          | 90.8                   | 8.31         |
|                  |                                        | 4                          | 5.57                          | 109.9                  | 8.31         |
|                  |                                        | 16                         | 19.59                         | 115.1                  | 21.24        |
| linolenic acid   | 0.11                                   | 0.25                       | 0.32                          | 87.2                   | 17.30        |
|                  |                                        | 1                          | 1.36                          | 125.8                  | 10.02        |
|                  |                                        | 4                          | 3.58                          | 86.8                   | 27.82        |
| palmitic acid    | 0.09                                   | 0.125                      | 0.23                          | 116.0                  | 21.69        |
|                  |                                        | 0.5                        | 0.75                          | 131.5                  | 8.28         |
|                  |                                        | 2                          | 1.78                          | 84.6                   | 25.64        |
| stearic acid     | 0.25                                   | 0.25                       | 0.49                          | 95.3                   | 20.71        |
|                  |                                        | 1                          | 1.41                          | 116.1                  | 7.53         |
|                  |                                        | 4                          | 3.39                          | 78.4                   | 26.33        |

128

129 Table S4. Results of actual sample analysis by GC-MS (n=6)

130

| Origin | arachidonic<br>acid | RSD/<br>% | linoleic<br>acid | RSD/<br>% | linolenic<br>acid | RSD/<br>% | palmitic<br>acid | RSD/<br>% | stearic<br>acid | RSD/<br>% |
|--------|---------------------|-----------|------------------|-----------|-------------------|-----------|------------------|-----------|-----------------|-----------|
|        | 1.43                |           | 0.35             |           | 1.11              |           | 0.14             |           | 0.33            |           |
|        | 1.03                |           | 0.32             |           | 1.11              |           | 0.13             |           | 0.38            |           |
| Henan  | 1.27                | 18.06     | 0.22             | 21.69     | 0.68              | 23.25     | 0.13             | 19.29     | 0.29            | 11.90     |
|        | 0.97                |           | 0.21             |           | 0.68              |           | 0.13             |           | 0.28            |           |
|        | 1.30                |           | 0.21             |           | 0.71              |           | 0.08             |           | 0.29            |           |
|        | 0.85                |           | 0.22             |           | 0.73              |           | 0.09             |           | 0.28            |           |

131

132
